# Supplementary material for: Mapping long‐range contacts between risk loci and target genes in human diseases with Capture Hi‐C
Source: PubMed Central journal article supplement (PMC7520083; doi:10.1002/ctm2.183), 2020-09-27

Supplementary Figure 1

**A** GSE139670/A\_23\_P202334

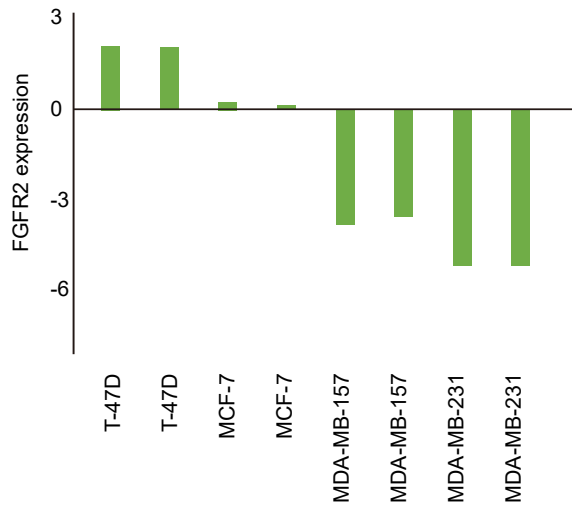

GSE139670/A\_24\_P206624

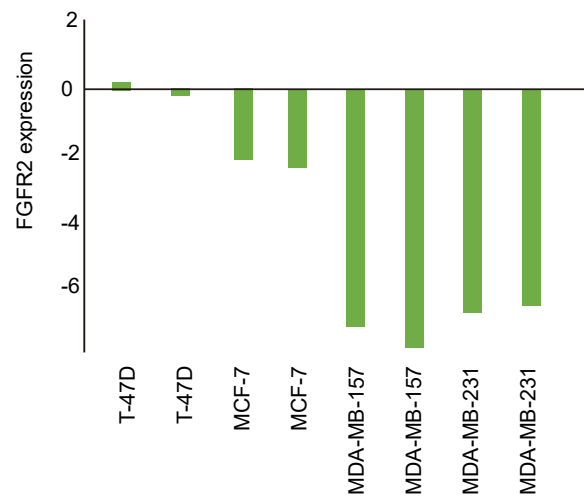

**B** GSE139670/A\_23\_P426944

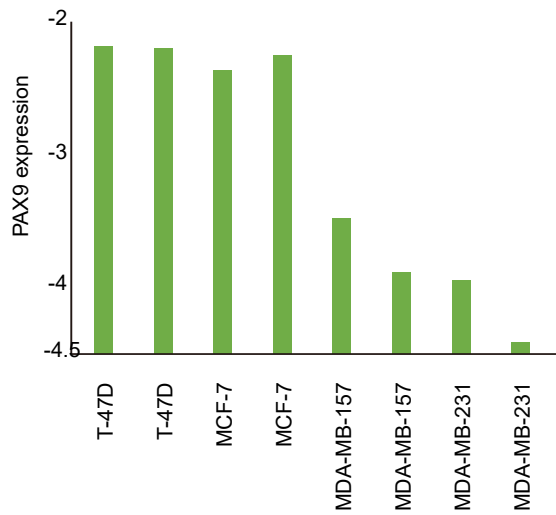

GSE139670/A\_32\_P70818

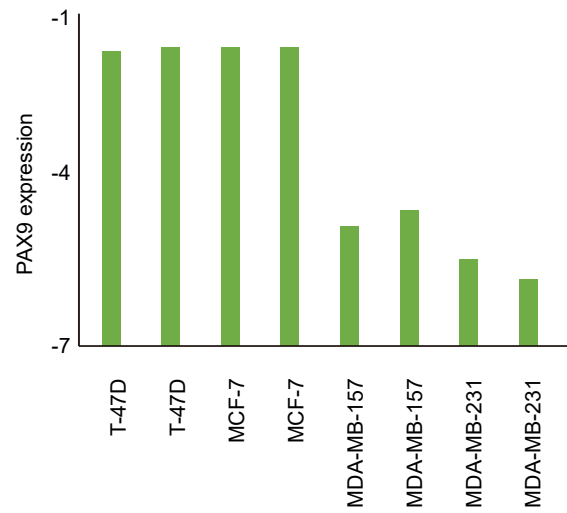

Supplementary Figure 2

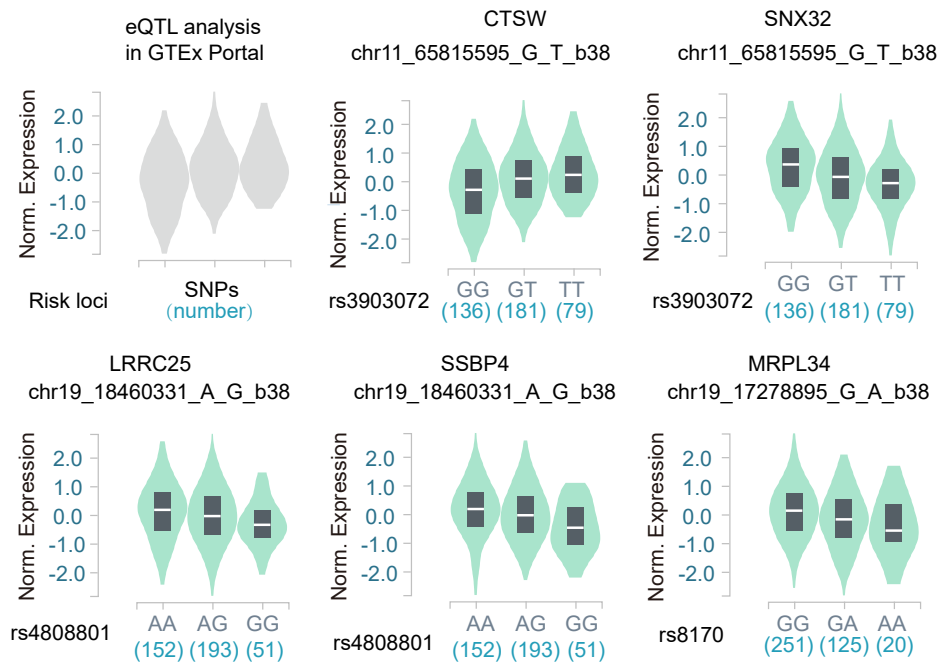

Supplementary Figure 3

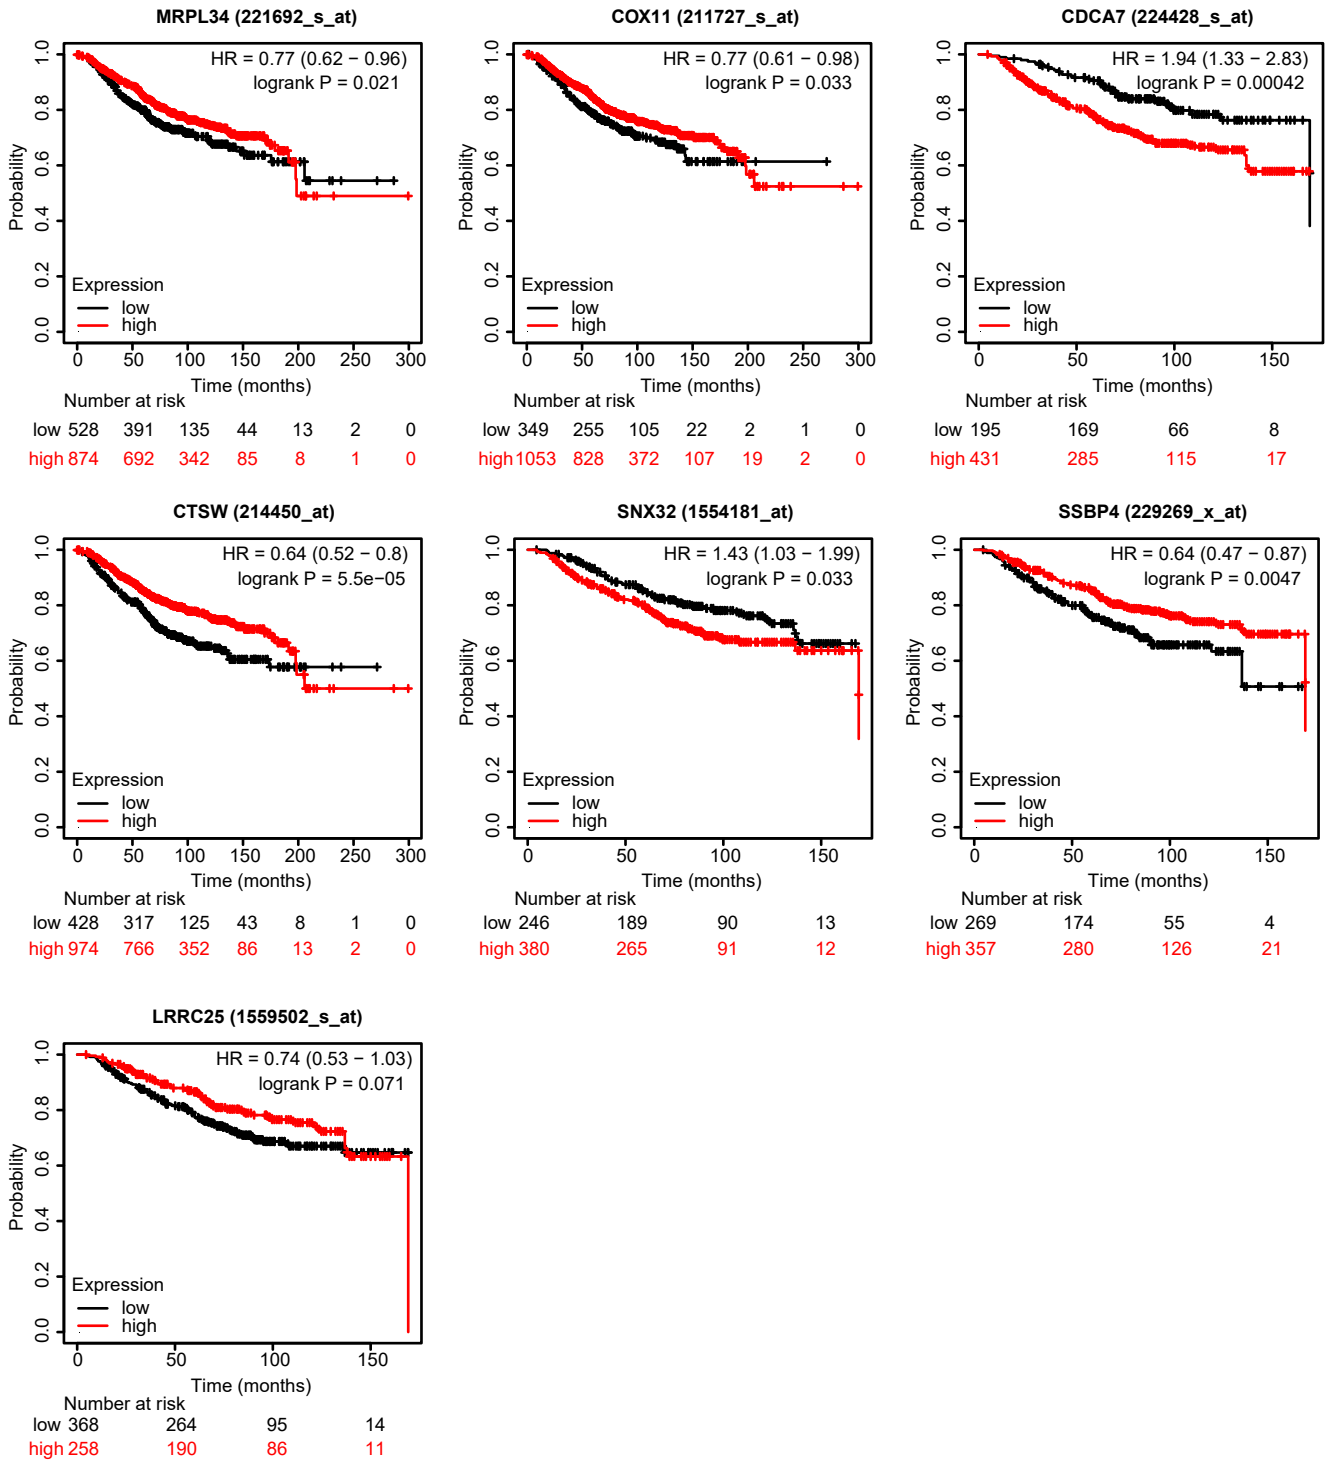

Supplementary Figure 4

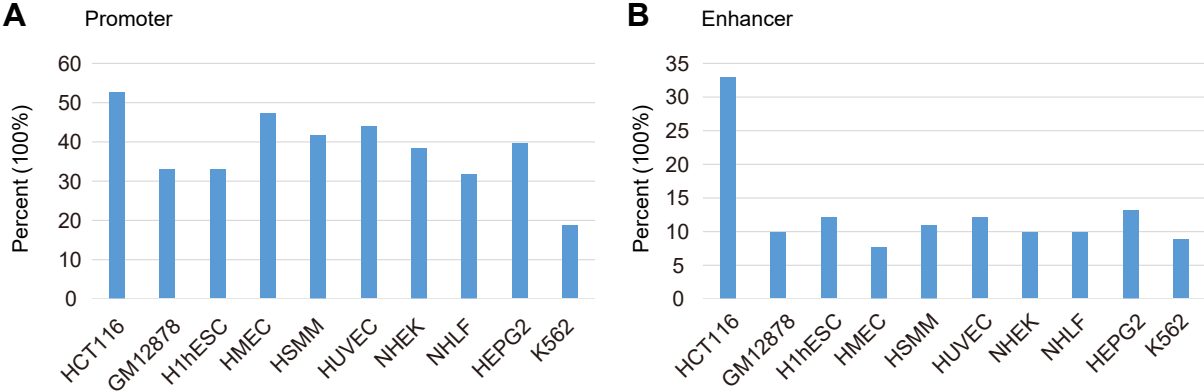

Data from reference 3

Supplementary Figure 5

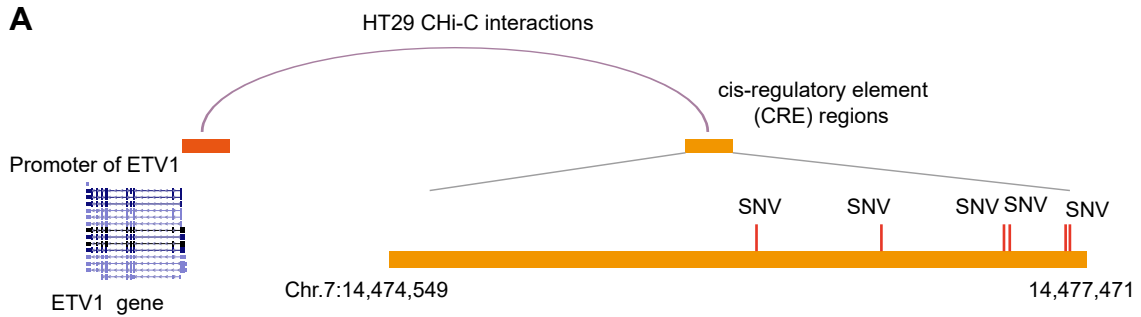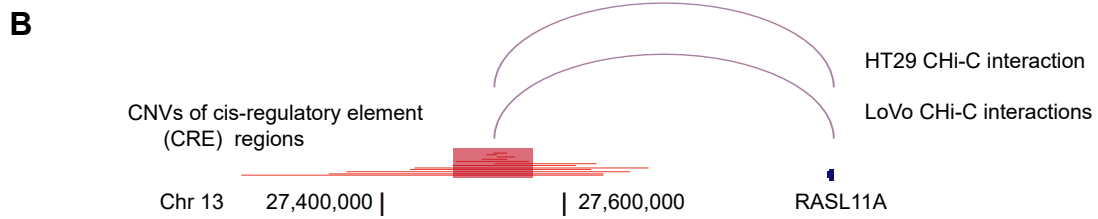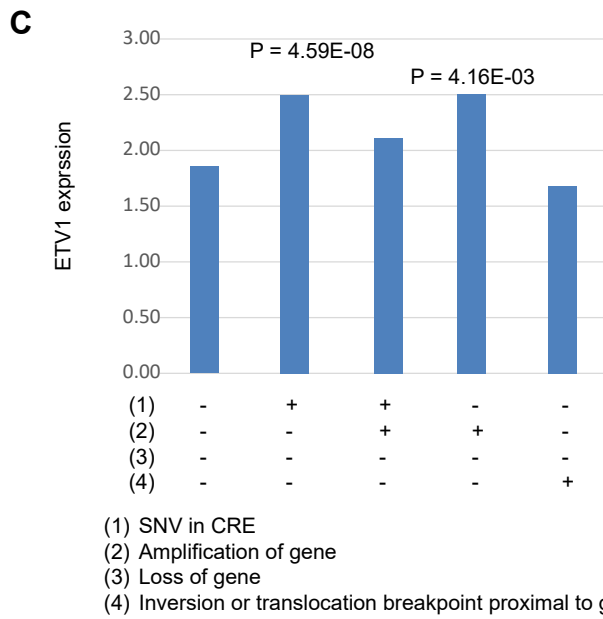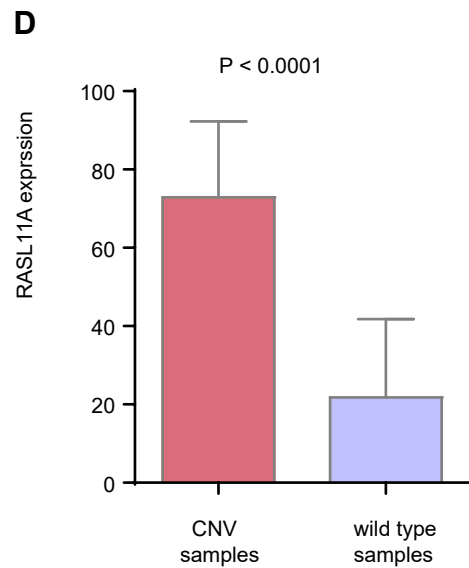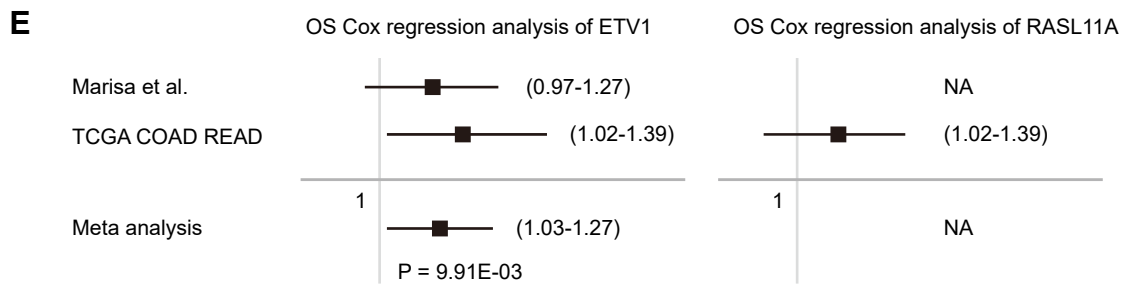

Supplementary Figure 6

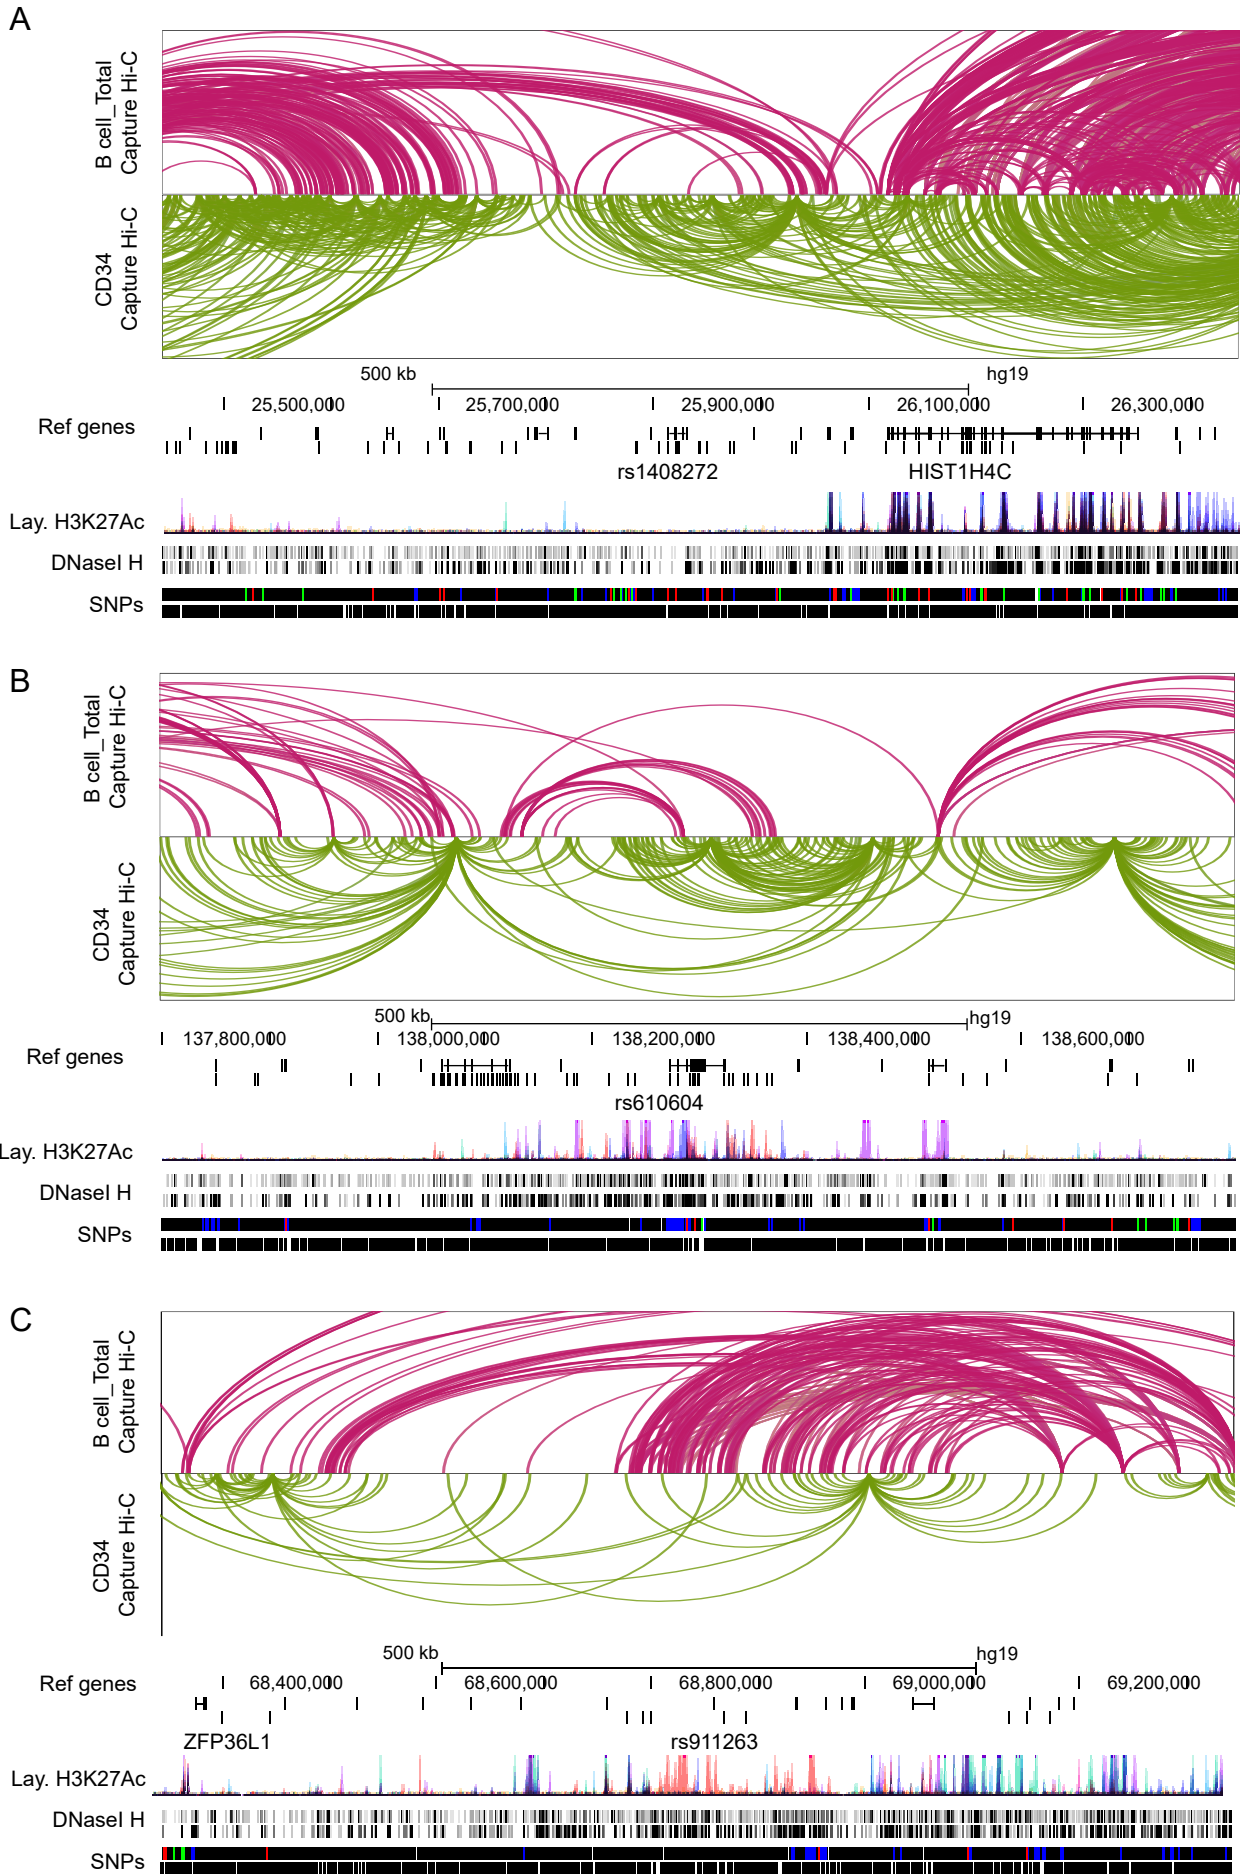

Supplementary Figure 7

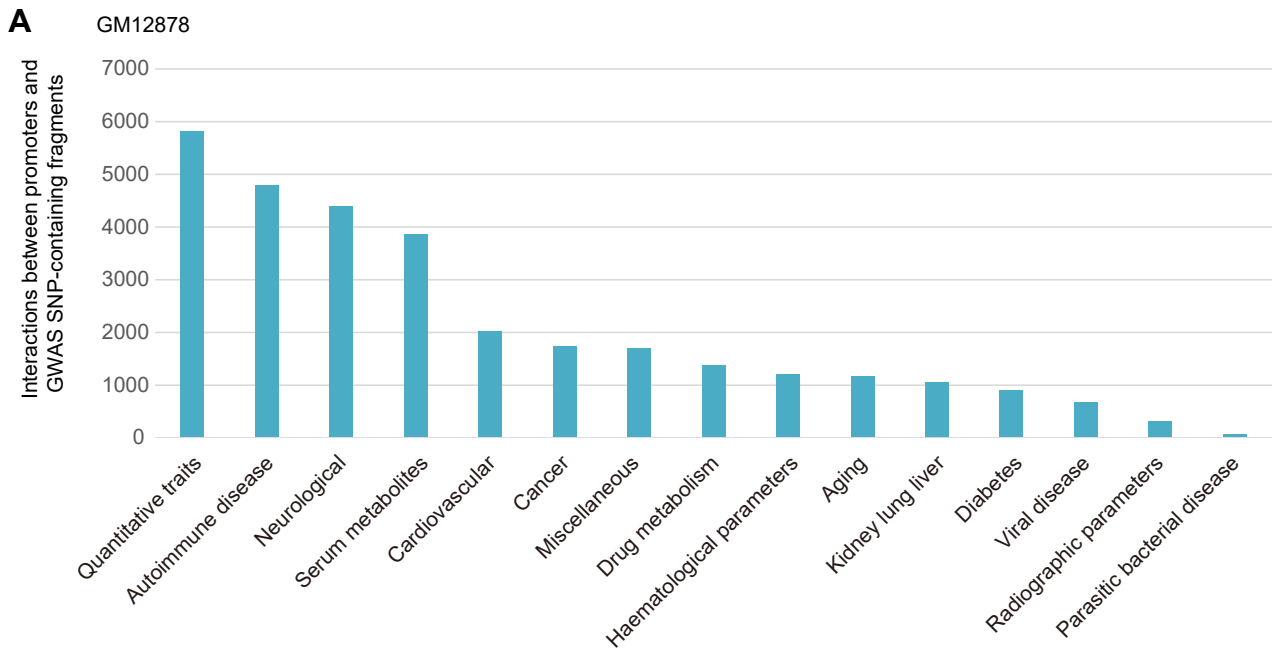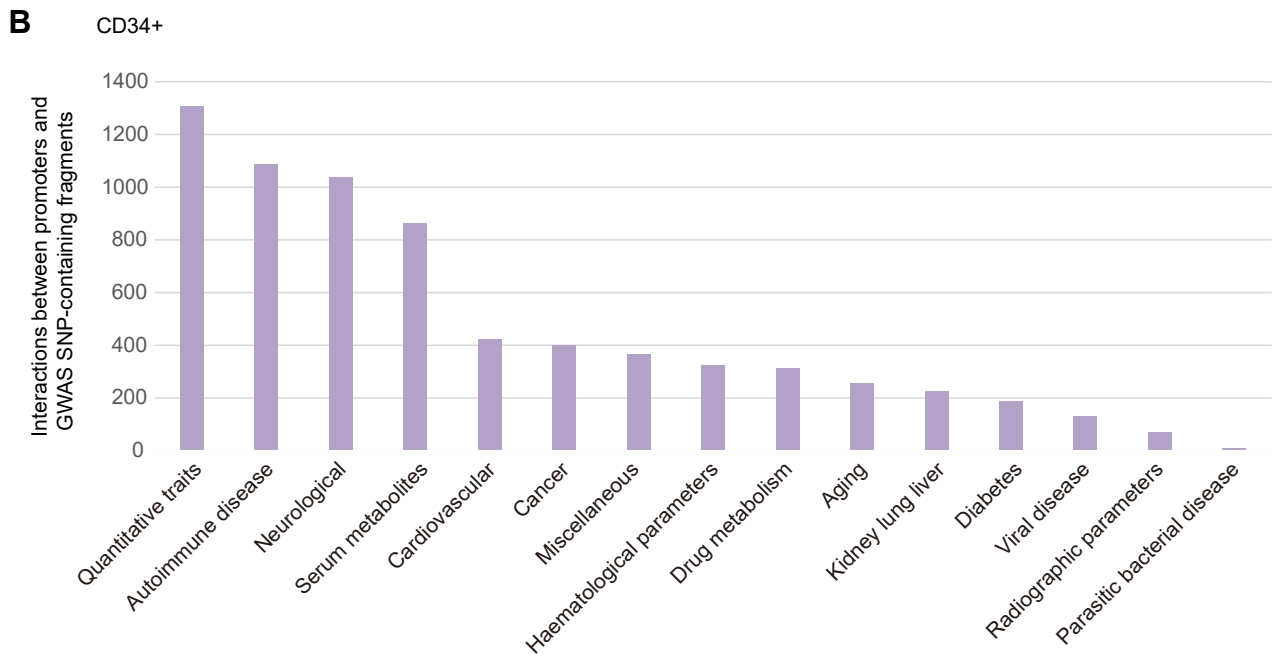

Supplement: CTM2-10-e183-s001.pdf [file CTM2-10-e183-s001.pdf]
